# Supplementary material
Source: publisher site journal article supplement (https://www.dovepress.com/article/229852)
Supplement: Supplementary file 1 [file get_supplementary_file.php]

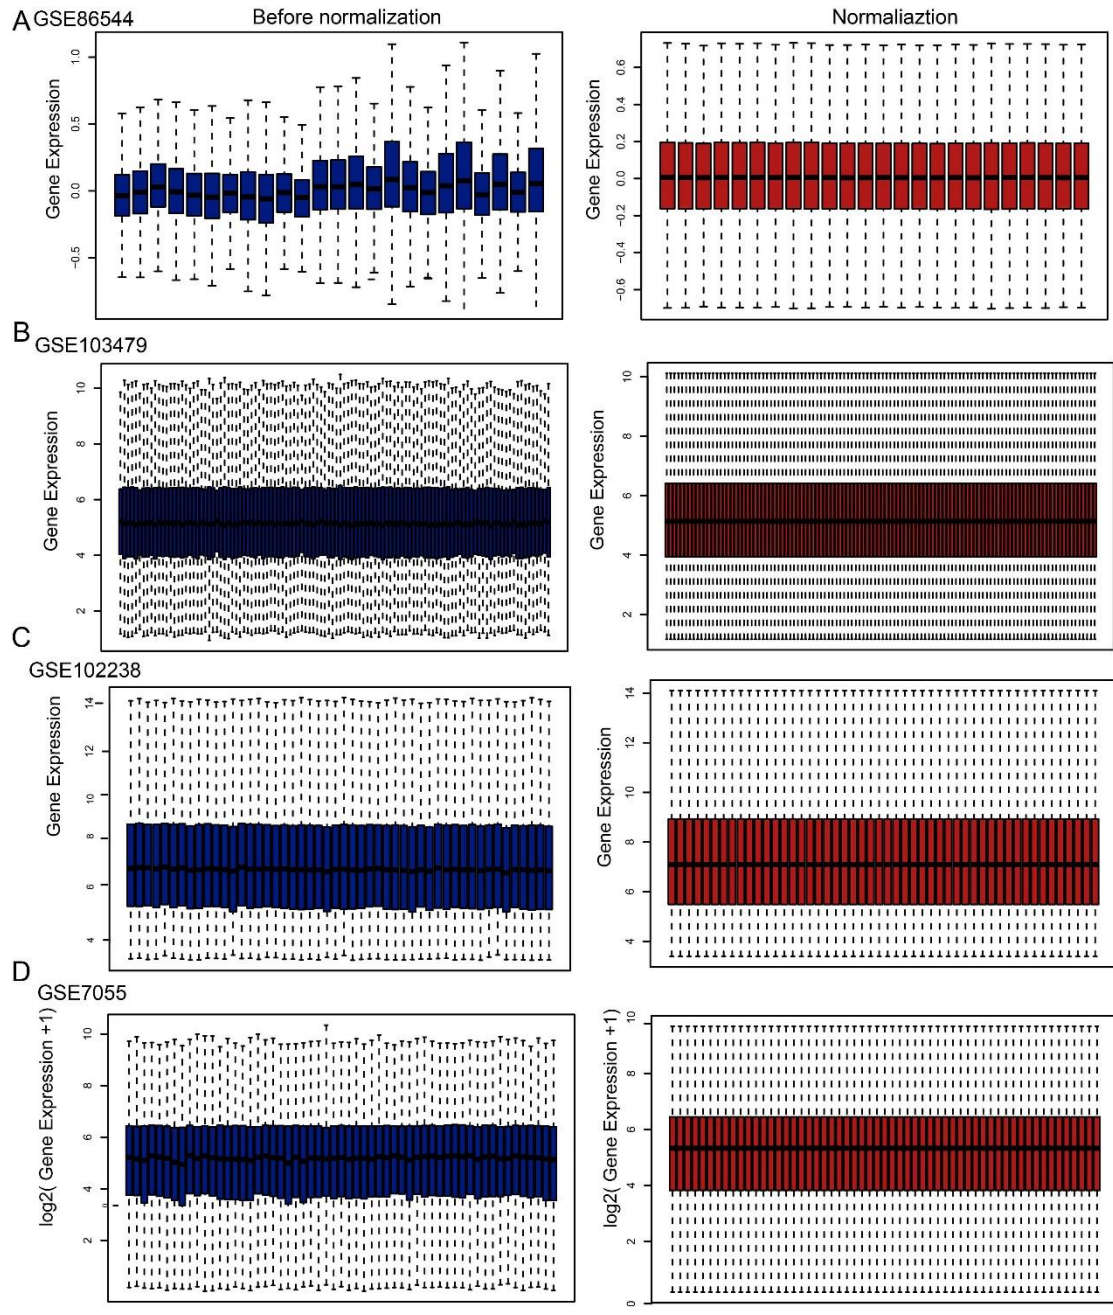

Supplementary Figure 1 Standardization of gene expression

**Notes:** (A) Standardization of GSE86544, (B) standardization of GSE103479, (C) standardization of GSE102238, (D) Standardization of GSE7055. The blue bar represents the data before normalization, and the red bar represents the data after normalization.

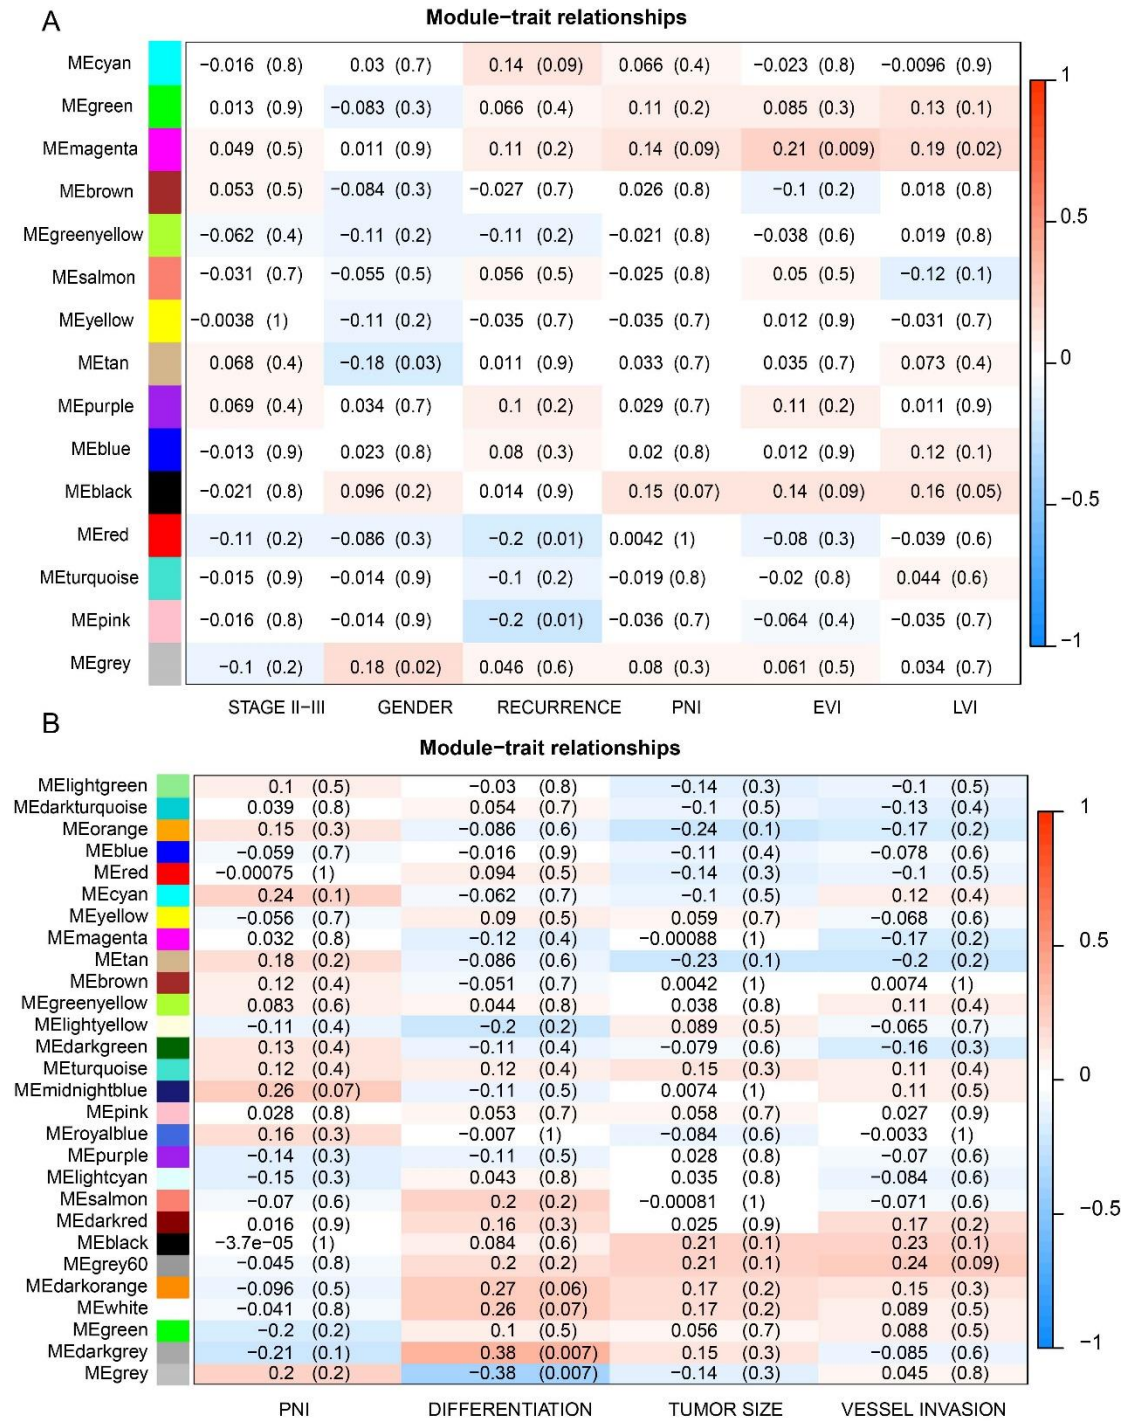

Supplementary Figure 2 Correlation between module eigengenes and clinical traits especially PNI in

GSE103479 and GSE102238 datasets.

**Notes:** (A, B) Module-trait relationships in GSE103479 and GSE102238 datasets. The correlation

coefficients and corresponding P-values in the brackets are contained in each cell. The table is color-

---

coded by correlation between eigengenes and traits according to the color legend on the right side. The modules with the most significant differences are displayed in brackets.

**Abbreviations:** PNI, perineural invasion.

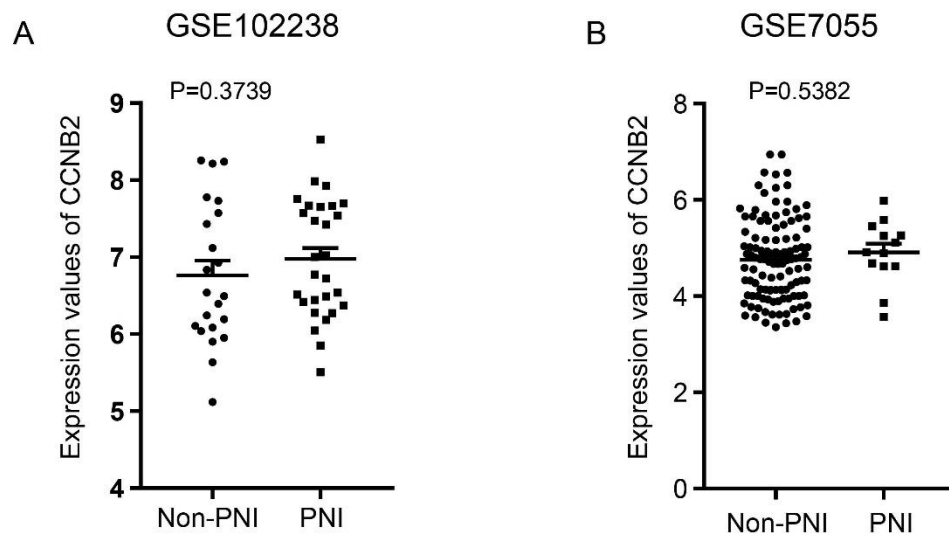

Supplementary Figure 3 The expression values of CCNB2 in pancreatic cancer (GSE102238) and colon cancer (GSE103479).

**Notes:** (A, B) CCNB2 expression values were detected in GSE102238 and GSE103479.

**Abbreviations:** CCNB2, cyclin B2

Supplementary Table 1 Results of top 20 pathway enrichment analysis of GSE7055

| Term         | Category                | Description                                                     | Count | Log10(P) | Genes                                                                                                                                                                                                    |
|--------------|-------------------------|-----------------------------------------------------------------|-------|----------|----------------------------------------------------------------------------------------------------------------------------------------------------------------------------------------------------------|
| GO:0000280   | GO Biological Processes | nuclear division                                                | 33    | -23.4    | BIRC5,BUB1B,CCNB1,CCNE1,CDC20,CKS2,KIF11,MAD2L1,MYBL2,SPAST, TOP2A,TTK,PRC1,PKMYT1,PTTG1,TRIP13,DLGAP5,TACC3,SMC2,SPAG5,UBE2C,ZWINT,TPX2,FBXO5,RACGAP1,NUSAP1,SPDL1,CDCA8,CEP55,ND C1,NSFL1C,KIF18B,ASPM |
| GO:1902850   | GO Biological Processes | microtubule cytoskeleton organization involved in mitosis       | 15    | -12.89   | BIRC5,CCNB1,CDC20,KIF11,MAD2L1,MYBL2,SPAST,TTK,PRC1,TACC3,TPX2,RACGAP1,NUSAP1,SPDL1,NSFL1C                                                                                                               |
| GO:0007156   | GO Biological Processes | homophilic cell adhesion via plasma membrane adhesion molecules | 16    | -12.53   | PCDHA9,NECTIN3,PCDHAC2,PCDHAC1,PCDHA13,PCDHA12,PCDHA11,PCDHA10,PCDHA8,PCDHA7,PCDHA6,PCDHA5,PCDHA4,PCDHA3,PCDHA2,PCDHA1                                                                                   |
| GO:0045787   | GO Biological Processes | positive regulation of cell cycle                               | 18    | -8.88    | CCNB1,CCNE1,CDK1,CKS2,ECT2,EZH2,FEN1,MAD2L1,SPAST,THOC5,DLGAP5,SPAG5,UBE2C,CIT,FBXO5,RACGAP1,NUSAP1,NSFL1C                                                                                               |
| R-HSA-453279 | Reactome Gene Sets      | Mitotic G1-G1/S phases                                          | 12    | -8.74    | CCNA2,CCNB1,CCNE1,CDK1,E2F3,MC2,MYBL2,RRM2,TK1,TOP2A,ORC6,FBXO5                                                                                                                                          |
| GO:0140013   | GO Biological Processes | meiotic nuclear division                                        | 12    | -8.03    | BUB1B,CCNE1,CDC20,CKS2,TOP2A,TTK,PTTG1,TRIP13,SMC2,FBXO5,NDC1,ASPM                                                                                                                                       |
| R-HSA-69478  | Reactome Gene Sets      | G2/M DNA replication checkpoint                                 | 4     | -7.78    | CCNB1,CDK1,PKMYT1,CCNB2                                                                                                                                                                                  |

|            |                         |                                                    |    |       |                                                                              |
|------------|-------------------------|----------------------------------------------------|----|-------|------------------------------------------------------------------------------|
| GO:0006260 | GO Biological Processes | DNA replication                                    | 13 | -6.64 | CCNA2,CCNE1,CDK1,FEN1,MCM2,RRM1,RRM2,PCLAF,GINS1,RNASEH2A,ORC6,FBXO5,GINS2   |
| GO:0032506 | GO Biological Processes | cytokinetic process                                | 6  | -6.31 | ANXA11,ECT2,SPAST,KIF20A,RACGAP1,CEP55                                       |
| GO:0071103 | GO Biological Processes | DNA conformation change                            | 13 | -5.81 | CCNB1,CDK1,HMGB3,MCM2,TOP2A,GINS1,SMC2,NUSAP1,GINS2,MIS18A,HJURP,CENPM,CENPU |
| GO:0044571 | GO Biological Processes | [2Fe-2S] cluster assembly                          | 3  | -5.36 | NFS1,BOLA2,BOLA2B                                                            |
| M14        | Canonical Pathways      | PID AURORA B PATHWAY                               | 5  | -4.93 | BIRC5,KIF20A,SMC2,RACGAP1,CDC A8                                             |
| GO:0006310 | GO Biological Processes | DNA recombination                                  | 11 | -4.76 | FEN1,HMGB3,KPNA2,MCM2,MSH2,SATAT6,TOP2A,TNFSF4,TRIP13,RAD51AP1,GINS2         |
| GO:0051303 | GO Biological Processes | establishment of chromosome localization           | 6  | -4.52 | CCNB1,DLGAP5,SPAG5,SPDL1,CDCA8,CEP55                                         |
| GO:0051653 | GO Biological Processes | spindle localization                               | 5  | -4.49 | MAD2L1,NUSAP1,SPDL1,NSFL1C,ASPM                                              |
| GO:0034502 | GO Biological Processes | protein localization to chromosome                 | 6  | -4.4  | CCT6A,CDK1,EZH2,MSH2,TTK,SPDL1                                               |
| GO:0032886 | GO Biological Processes | regulation of microtubule-based process            | 9  | -4.31 | KIF11,SPAST,TACC3,SPAG5,TPX2,MEMO1,NSFL1C,MAP6D1,RAB6C                       |
| GO:0006890 | GO Biological Processes | retrograde vesicle-mediated transport, Golgi to ER | 6  | -4.28 | KIF11,RAB6A,RACGAP1,RAB6B,RAB6C,RAB6D                                        |

|          |                    |                      |   |       |                                                   |
|----------|--------------------|----------------------|---|-------|---------------------------------------------------|
| hsa03013 | KEGG Pathway       | RNA transport        | 8 | -4.27 | THOC5,EIF4G3,EIF2B3,TACC3,RPP40,GEMIN8,NDC1,THOC7 |
| M242     | Canonical Pathways | PID AURORA A PATHWAY | 4 | -4.05 | THOC5,EIF4G3,EIF2B3,TACC3,RPP40,GEMIN8,NDC1,THOC7 |

Supplementary Table 2 Results of top 20 pathway enrichment analysis of GSE86544

| Term          | Category           | Description            | Count | Log10(P) | Genes                                                                                                                                                                                                                                                                                                                                                                                                                                                                                                                                                                    |
|---------------|--------------------|------------------------|-------|----------|--------------------------------------------------------------------------------------------------------------------------------------------------------------------------------------------------------------------------------------------------------------------------------------------------------------------------------------------------------------------------------------------------------------------------------------------------------------------------------------------------------------------------------------------------------------------------|
| R-HSA-1280218 | Reactome Gene Sets | Adaptive Immune System | 91    | -14.4    | AP1B1,CALM2,CALR,CD3D,CD3E,CD86,CD40,CDC34,CENPE,CHUK,CTSD,CTSK,CXADR,FCGR3A,HLA-DOB,IKBKB,KIR2DL1,KIR3DL1,KLRB1,KIF22,KRAS,LCP2,LMO7,LYN,MICB,NFKBIE,PIK3CA,PPP2R5D,PRKACA,PSMA1,PSMA3,PSMA5,PSMB4,PSMC4,PSMD2,SIPA1,SIGLEC1,TLR4,UBA1,UBE2G1,VAV1,CUL2,CUL1,RIPK2,BTRC,SOCS3,UBA3,VAMP3,KIF3B,RASGRP1,RNF41,PSME3,SEC23A,CD226,SEC24A,KIF2C,RAPGEF4,GLMN,UBOX5,KIFAP3,MGRN1,UBR2,RASGRP3,HECTD1,KIF26A,FBXO2,FBXO9,KLHL20,BLNK,CD209,SAR1B,BTBD1,TREM2,TREM1,UBE2R2,UBE2W,TRIM39,TRIB3,PJA1,TUBAL3,ULBP1,KIF18A,CARD11,DCTN5,TUBB6,FBXL20,TRIM4,KLC4,FBXO17,AP1S3,BTLA |
| R-HSA-199991  | Reactome Gene Sets | Membrane Trafficking   | 81    | -14.36   | AP1B1,BICD1,BTC,CALM2,CD3D,CENPE,CUX1,DAB2,EPS15,GOLGA4,KIFC1,KIF22,RAB8A,MYO6,PAFAH1B1,PAFAH1B2,PLA2G4A,PRKAB1,PRKAB2,RAB3A,RAB4A,VPS52,TRAPPC2,VAMP2,TSC2,WNT5A,SATAM,GBF1,SYNJ1,SYNJ2,CYTH3,CYTH2,CYTH1,TRIP11,VAMP3,KIF3B,VPS4B,RIN1,GCC2,CLINT1,PUM1,SEC16A,STAM2,BET1,SEC23A,ARPC1A,KIF1C,SEC24A,COP8,COPS6,KIF2C,KIFAP3,SCFD1,EXOC7,COG4,NECAP1,LDLRAP1,KIF26A,ARFGAP3,VPS4A,ITSN2,SAR1B,TRAPPC4,VTA1,                                                                                                                                                            |

|               |                    |                     |    |        |                                                                                                                                                                                                                                                                                                                                                                                                                                                                                                                    |
|---------------|--------------------|---------------------|----|--------|--------------------------------------------------------------------------------------------------------------------------------------------------------------------------------------------------------------------------------------------------------------------------------------------------------------------------------------------------------------------------------------------------------------------------------------------------------------------------------------------------------------------|
|               |                    |                     |    |        | VPS54,EXOC6,KIF26B,KIF16B,TUBAL3,KIF18A,COG8,DCTN5,TUBB6,KLC4,KIFC2,COG7,CHMP4C,FCHO2,NAA30,AP1S3,RAB43                                                                                                                                                                                                                                                                                                                                                                                                            |
| GO:0022411    | GO                 | cellular            | 72 | -13.31 | ADD3,APC,APEH,MRPL49,CFL2,CSNK2A2,CTSK,DPP4,EIF5A,EPS8,ETF1,F2RL1,FAP,FZD2,GBA,H1-0,IGF1R,ITGAM,MMP2,MMP11,MMP13,MMP16,PAFAH1B1,PPP1CA,SET,SMARCC1,SMARCD1,SMARCD2,TSC2,FZD1,BECN1,GBF1,SYNJ1,CCNB2,VPS4B,HDAC6,RNF41,CAMKK2,NES,NEK6,KIF2C,SUPT16H,ATG14,SETX,FRAT2,GSPT2,LMOD1,WIPI2,VPS4A,MRPS18B,MRPL15,MRPS18C,TRMT112,VTA1,MRPS23,MRPL39,TREM2,MRPL50,PDXP,MRPL14,MRPS24,MRPS15,MRPS11,MRPS9,MRPL1,KIF18A,GRWD1,ADD45GIP1,H2AW,ACVR1C,MRPL21,KIF24                                                           |
| R-HSA-8953854 | Reactome Gene Sets | Metabolism of RNA   | 82 | -13.3  | CCNH,ETF1,GTF2F1,GTF2H3,HSPA1B,MAGOH,MNAT1,CNOT2,NUP98,PCBP1,EXOSC9,POLR2L,PSMA1,PSMA3,PSMA5,PSMB4,PSMC4,PSMD2,RPL22,RPS13,SET,SRSF3,SRSF7,SNRPA1,SNRPB2,SNRPF,PABPN1,DHX16,SRSF9,DDX21,WDR46,SNRNP40,NUP155,EIF4A3,LCMT2,PQBP1,RCL1,PSME3,MPHOSPH6,CWC27,PPIH,CHERP,WDR3,SNRNP35,NUP42,WBP4,XPOT,U2AF2,XRN2,EXOSC7,SMG6,PPWD1,GSPT2,PRPF6,NOL11,TFB1M,TRMT112,TRMT6,SF3B6,PUS7,DDX49,TRIT1,THG1L,TYW1,RIOK2,ZMAT5,DHX37,NOL6,WDR77,NOL12,GEMIN6,THOC7,EDC3,PUS1,SARNP,TGS1,NT5C3B,TRMT61A,NUP35,LSM11,DCP1B,PATL1 |
| GO:0001816    | GO                 | cytokine production | 90 | -12.84 | ATF4,AXL,BST2,RUNX1,CD2,CD3E,CD6,CD86,CD40,CEBPG,CHRNA7,CHUK,CMKLR1,EPHA2,F2RL1, FN1,ACKR1,XRCC6,GATA3,GBA,GBP1,GHSR,HMOX1,HSPA1B,IFNG,IFNGR1,RBPJ,IL10,IL12A,IL12RB2,INH1A,INHBB,IRF4,ITGB6,KIT,LCP2,LGALS9,LYN,MC1R,CD46,MYB,PCSK5,POLR2L,PRKCZ,PTPRS,S100A12,SLAMF1,PPP1R1,TLR3,TLR4,TNFRSF4,WNT5A,RIPK2,RP                                                                                                                                                                                                     |

|              |                               |                               |    |        |                                                                                                                                                                                                                                                                                                                                                                                                                                                                                                                            |
|--------------|-------------------------------|-------------------------------|----|--------|----------------------------------------------------------------------------------------------------------------------------------------------------------------------------------------------------------------------------------------------------------------------------------------------------------------------------------------------------------------------------------------------------------------------------------------------------------------------------------------------------------------------------|
|              |                               |                               |    |        | S6KA4,NMI,DDX21,AIM2,EIF2AK3,POLR1C,SOCS5,PUM1,PQBP1,RASGRP1,POLR3G,CD226,GLMN,SULF1,PLCB1,DDX58,KPNA6,CRCP,DDX41,HDAC7,TREM2,SASH3,RNF216,RNF125,FERMT1,SPHK2,DHX33,TWSG1,IFIH1,NLRC5,RNF135,CARD11,HAVCR2,TNFRSF13C,CCDC88B,NRROS,USP17L2                                                                                                                                                                                                                                                                                |
| GO:0051640   | GO<br>Biological<br>Processes | organelle<br>localization     | 82 | -12.24 | BICD1,CDH2,CENPE,HMOX1,KIF5C,KIT,KIFC1,KIF22,LGALS9,LLGL1,LYN,RAB8A,NPM1,NUP98,PAFAH1B1,PRKACA,PRKCZ,RAB3A,RAC2,TRAPPC2,AURKA,VAMP1,VAMP2,SYP,DYNLT1,UCHL1,WNT7A,MKKS,SSNA1,STX11,BECN1,SNX4,GBF1,SYNJ1,DGKI,VAMP3,KIF3B,STX8,VPS4B,ESPL1,SEC16A,HDAC6,RASGRP1,LRPPRC,SPRY2,BET1,SEC23A,UNC13B,KIF1C,SEC24A,KIF2C,FGFR1OP,PDCD10,ATG14,KIFAP3,RRS1,SCFD1,ARFGAP3,VPS4A,SARR1B,TRAPPC4,EXOC6,HAUS6,CENPQ,RIOK2,CENPJ,PARD3,SPHK2,KIF13A,TRAK2,KIF18A,NUF2,BRSK1,FBXL20,TMEM67,CHMP4C,STX1B,CDCA5,CEP120,TSNARE1,KIF24,RAB15 |
| R-HSA-109582 | Reactome<br>Gene Sets         | Hemostasis                    | 75 | -12.07 | ANGPT2,ATP1B2,CALM2,CD2,CENPE,CXADR,DOCK2,DOCK3,FN1,GATA3,GNA15,GNG11,GUCY1A1,HBD,ITGA6,ITGA1,ITGA3,ITGAM,KCNMB1,KIFC1,KIF22,KRAS,LCP2,LGALS3BP,LYN,MYB,PDE2A,PIK3CA,PLA2G4A,PLAT,PLAU,PPP2R5D,PRKACA,PRKCH,PRKCZ,RAC2,RAD51B,SLC3A2,TIMP3,VAV1,SLC7A5,DGKD,TNFRSF10B,F2RL3,DGKI,KIF3B,DOCK4,RASGRP1,FAM3C,GNA13,KIF1C,PDE10A,KIF2C,RAPGEF4,KIFAP3,KDM1A,SLC7A11,KIF26A,BRPF3,GP6,GNG13,TREM1,GNG2,KIF26B,KIF16B,CDC37L1,DOCK6,TUBAL3,KIF18A,TUBB6,KLC4,KIFC2,DGKH,NHLRC2,H3C13                                            |
| hsa04151     | KEGG<br>Pathway               | PI3K-Akt<br>signaling pathway | 51 | -11.74 | ANGPT2,ATP1B2,CALM2,CD2,CENPE,CXADR,DOCK2,DOCK3,FN1,GATA3,GNA15,GNG11,GUCY1A1,HBD,ITGA6,ITGA1,ITGA3,ITGAM,KCNMB1,KIFC1,KIF22,KRAS,LCP2,LGALS3BP,LYN,MYB,PDE2A,PIK3C                                                                                                                                                                                                                                                                                                                                                        |



|            |                               |                                        |    |        |                                                                                                                                                                                                                                                                                                                                                                                                                                                                                                                                  |
|------------|-------------------------------|----------------------------------------|----|--------|----------------------------------------------------------------------------------------------------------------------------------------------------------------------------------------------------------------------------------------------------------------------------------------------------------------------------------------------------------------------------------------------------------------------------------------------------------------------------------------------------------------------------------|
|            |                               |                                        |    |        | A,PLA2G4A,PLAT,PLAU,PPP2R5D,PRKACA,PRKCH,PRKCZ,RAC2,RAD51B,SLC3A2,TIMP3,VAV1,SLC7A5,DGKD,TNFRSF10B,F2RL3,DGKI,KIF3B,DOCK4,RASGRP1,FAM3C,GNA13,KIF1C,PDE10A,KIF2C,RAPGEF4,KIFAP3,KDM1A,SLC7A11,KIF26A,BRPF3,GP6,GNG13,TREM1,GNG2,KIF26B,KIF16B,CDC37L1,DOCK6,TUBAL3,KIF18A,TUBB6,KLC4,KIFC2,DGKH,NHLRC2,H3C13                                                                                                                                                                                                                     |
| GO:0046649 | GO<br>Biological<br>Processes | lymphocyte<br>activation               | 83 | -11.7  | AXL,BST2,RUNX1,CD2,CD3D,CD3E,CD6,CD7,CD27,CD86,CD40,CEBPG,CXADR,DOCK2,DPP4,GPR183,EFNB1,F2RL1,GATA3,HMGB3,HPRT1,IFNG,IGFBP2,RBPJ,IL2RA,IL10,IL12A,IMPDH2,INHA,IRF4,KIT,LGALS9,LMO1,CD180,LYL1,LYN,CD46,MICB,MSH2,MYB,PIK3CA,PRKCZ,RAC2,RPL22,CCL2,SLAMF1,SUPT6H,VAMP2,PRDX2,TGFBR2,TLR4,TNFRSF4,VAV1,FZD7,FZD9,NCK2,TNFSF9,RIPK2,RNF8,SOCS5,TOX,MAFB,PARP3,RASGRP1,RNF41,GLMN,NCSTN,BLNK,CD209,IL21R,SASH3,LRRC8A,CYP26B1,TWSG1,BCL11B,TNIP2,ATAD5,ULBP1,CARD11,HAVCR2,TNFRSF13C,BTLA,CCDC88B                                    |
| GO:0019221 | GO<br>Biological<br>Processes | cytokine-mediated<br>signaling pathway | 87 | -11.44 | AXL,BST2,CASP4,RUNX1,CD27,CD86,CD40,CHUK,CCR8,CMKLR1,CSF1,S1PR1,EDN2,F2RL1,FOXO1,FN1,ACKR1,IFI6,GATA3,GBP1,CXCR3,CXCL1,HMOX1,HSPA1B,IFIT2,IFIT1,IFNAR2,IFNG,IFNGR1,IFNGR2,IKBKB,IL2RA,IL2RB,IL2RG,IL10,IL12A,IL12RB2,IL13RA1,IL16,IRF4,IRS1,ITGAM,KIT,KRAS,MMP2,OAS1,PAFAH1B1,PIK3CA,PITPNA,PRKACA,PSMA1,PSMA3,PSMA5,PSMB4,PSMC4,PSMD2,CCL2,CCL8,CCL22,SNRPA1,TRAF1,TNFRSF4,VAV1,WNT5A,MKKS,CUL1,OASL,TNFSF9,RIPK2,BTRC,RPS6KA4,SOCS3,NMI,AIM2,SOCS5,PSME3,IRF9,PLCB1,CLIP3,IL21R,TREM2,RNF31,TRIM68,TNIP2,NLRC5,TNFRSF13C,H3C13 |
| GO:1903706 | GO<br>Biological<br>Processes | regulation<br>of<br>hemopoiesis        | 61 | -10.96 | AXL,CA2,RUNX1,CD2,CD27,CD86,CSF1,FBN1,GATA3,HCLS1,HMGB3,HSPA1B,IFNG,IL2RA,IL12A,INHA,IRF4,LGALS9,LMO                                                                                                                                                                                                                                                                                                                                                                                                                             |

|                  |                       |                                                 |       |        |  |                                                                                                                                                                                                                                                                                                                                                                                                                                                                                                                                                 |
|------------------|-----------------------|-------------------------------------------------|-------|--------|--|-------------------------------------------------------------------------------------------------------------------------------------------------------------------------------------------------------------------------------------------------------------------------------------------------------------------------------------------------------------------------------------------------------------------------------------------------------------------------------------------------------------------------------------------------|
|                  |                       |                                                 |       |        |  | 1,LOX,LYN,CD46,KITLG,KMT2A,MYB,N<br>F1,PRKCZ,PSMA1,PSMA3,PSMA5,PSMB4<br>,PSMC4,PSMD2,TAL1,PRDX2,TGFBR2,TL<br>R3,TLR4,H4C2,TNFSF9,RIPK2,SOCS5,SET<br>D1A,TOX,MAFB,RASGRP1,RNF41,PSME3<br>,MYL9,TREM2,SASH3,PUS7,PRMT6,CYP2<br>6B1,CARD11,LEO1,PPARGC1B,TMEM64,<br>AGO4,FLCN,H3C13                                                                                                                                                                                                                                                                |
| GO:0007169       | GO                    | transmembrane                                   | 80    | -10.9  |  | ANGPT2,APC,ATP6V1B2,ATP6V1C1,AXL,<br>BTC,CD3E,CD7,CHN1,COL4A5,CSF1,EFN<br>A4,EFNB1,EPHA2,EPHA1,EPS15,FGF5,FG<br>F7,FOXO1,FLT1,IFI6,GATA3,GHSR,GTF2F<br>1,IGF1R,IGFBP2,RBPJ,IRS1,ITGA1,KIT,LC<br>P2,LOX,LYN,MMP2,MYO1E,NKX3-<br>1,PIK3CA,PLAT,POLR2L,PRKAA1,PRKCZ,<br>PTPN3,ROS1,SMARCC1,SOX9,TSC2,VAV1<br>,WNT5A,STAM,SHOC2,NCK2,DGKD,FGF<br>18,FGF17,SOCS3,NOG,EIF2AK3,SOCS5,L<br>RIG2,SPRY3,SPRY2,STAM2,ARPC1A,SET<br>X,SULF1,PLCB1,NCSTN,ATP6V0A2,NGEF<br>,PTPN18,BLNK,ATP6V1D,ATP6V1H,SHC3,<br>KIF16B,FAT4,SHCBP1,ARAP1,ATP6V1C2,<br>TRIM72 |
| R-HSA-<br>449147 | Reactome<br>Gene Sets | Signaling<br>Interleukins                       | by 73 | -10.77 |  | BTC,CALM2,CD86,CHUK,CSF1,S1PR1,FG<br>F5,FGF7,FOXO1,FN1,GATA3,GRIN2D,CX<br>CL1,HMOX1,IFNG,IKBKB,IL2RA,IL2RB,I<br>L2RG,IL10,IL12A,IL12RB2,IL13RA1,IL16,I<br>RF4,IRS1,ITGAM,KIT,KRAS,LGALS9,LYN<br>,KITLG,MAP3K11,MMP2,NF1,PIK3CA,PIT<br>PNA,PPP2R5D,PRKACA,PSMA1,PSMA3,P<br>SMA5,PSMB4,PSMC4,PSMD2,RPS6KA1,S<br>100A12,CCL2,CCL22,SNRPA1,VAMP2,VA<br>V1,CUL1,RIPK2,FGF18,FGF17,BTRC,SOC<br>S3,RASAL2,SOCS5,RASGRP1,RASA4,PS<br>ME3,RASGRP3,PTPN18,BLNK,PIK3R4,IL2<br>1R,SHC3,TRIB3,TNIP2,HAVCR2,H3C13                                             |
| GO:0051345       | GO                    | positive regulation<br>of hydrolase<br>activity | 83    | -10.65 |  | ADRB1,ARHGAP1,ATP1B2,CALM2,CASP<br>4,CASP10,CD40,CHN1,CTSD,DOCK2,S1P<br>R1,EPHA2,EIF5,EPHA1,F2RL1,FLT1,FN1,<br>GNA15,GNAT1,DNAJB2,IFNG,ITGA6,ITG<br>A1,KIT,LGALS9,LLGL1,LYN,MSH2,MYL4<br>,NEDD9,NF1,NKX3-<br>1,PRKCZ,RAB3A,RAB4A,RGS2,CCL2,CC<br>L8,CCL22,SIPA1,TSC2,VAV1,WNT5A,GPR                                                                                                                                                                                                                                                             |

|            |                               |                                                  |          |       |                                                                                                                                                                                                                                                                                                                                                                                                     |                                                                                                                                                                                                                                                                                                                   |
|------------|-------------------------------|--------------------------------------------------|----------|-------|-----------------------------------------------------------------------------------------------------------------------------------------------------------------------------------------------------------------------------------------------------------------------------------------------------------------------------------------------------------------------------------------------------|-------------------------------------------------------------------------------------------------------------------------------------------------------------------------------------------------------------------------------------------------------------------------------------------------------------------|
|            |                               |                                                  |          |       |                                                                                                                                                                                                                                                                                                                                                                                                     | 65,RGS20,RIPK2,RGS11,TNFRSF10B,ARH<br>GEF1,AIM2,EIF2AK3,RASAL2,RIN1,DOC<br>K4,STARD8,DNAJB6,RASGRP1,RASA4,PS<br>ME3,SEC23A,GNA13,RAB11FIP2,PLCB1,R<br>ASGRP3,ARFGAP3,PCOLCE2,ELMOD1,R<br>GS18,ARAP3,RGPD5,PPP1R15B,ACAP3,A<br>RAP1,AGAP2,AGAP3,AGAP4,DNAJC24,A<br>CVR1C,PPARGC1B,STXBP5,FLCN,ARHG<br>AP30,USP17L2 |
| GO:0045088 | GO<br>Biological<br>Processes | regulation<br>of<br>innate<br>immune<br>response | of<br>57 | -9.96 | CHUK,CTSK,F2RL1,XRCC6,HMGB3,HSP<br>A1B,IFNAR2,IFNG,IFNGR1,IFNGR2,IKKB<br>B,IL12A,IRF4,ITGAM,KRAS,LGALS9,LYN<br>,MICB,SERPINB9,PRKACA,PSMA1,PSMA<br>3,PSMA5,PSMB4,PSMC4,PSMD2,PTPRS,T<br>LR3,TLR4,VAV1,WNT5A,CUL1,RIPK2,BT<br>RC,SOCS3,NMI,AIM2,PUM1,PQBP1,RASG<br>RP1,PSME3,POLR3G,CD226,RAB11FIP2,D<br>DX58,CD209,PIK3R4,TREM2,RNF125,IFIH<br>1,TNIP2,ULBP1,NLRC5,RNF135,CARD11,<br>HAVCR2,USP17L2 |                                                                                                                                                                                                                                                                                                                   |
| hsa05168   | KEGG<br>Pathway               | Herpes<br>simplex<br>infection                   | 32       | -9.24 | CDC34,CHUK,CSNK2A2,HLA-DMA,HLA-<br>DOB,IFIT1,IFNAR2,IFNG,IFNGR1,IFNGR2<br>,IKKB,IL12A,OAS1,CFP,PPP1CA,CCL2,S<br>RSF3,SRSF7,TAF5,TLR3,TRAF1,USP7,CU<br>L1,SRSF9,SOCS3,EIF2AK3,GTF2IRD1,IRF<br>9,DDX58,UBE2R2,NXF3,IFIH1                                                                                                                                                                              |                                                                                                                                                                                                                                                                                                                   |
| hsa04144   | KEGG<br>Pathway               | Endocytosis                                      | 39       | -9.2  | ADRB1,DAB2,EPS15,FLT1,GRK5,HSPA1B,<br>IGF1R,IL2RA,IL2RB,IL2RG,KIF5C,KIT,RA<br>B8A,PRKCZ,RAB4A,TGFBR2,STAM,SNX4<br>,GBF1,CYTH3,CYTH2,CYTH1,VPS4B,RNF<br>41,STAM2,ARPC1A,RAB11FIP2,LDLRAP1<br>,ARFGAP3,VPS4A,VTA1,PARD3,ARAP3,P<br>ARD6B,CHMP4C,ACAP3,ARAP1,AGAP2,<br>AGAP3                                                                                                                           |                                                                                                                                                                                                                                                                                                                   |
| GO:0007346 | GO<br>Biological<br>Processes | regulation<br>of<br>mitotic cell cycle           | 71       | -9.14 | APC,BTC,CDKN2B,CENPE,GADD45A,AR<br>ID3A,FAP,HSPA1B,HUS1,IL10,MSH2,NKX<br>3-<br>1,CNOT2,PAFAH1B1,PPP1R10,PRKACA,P<br>KN2,PSMA1,PSMA3,PSMA5,PSMB4,PSM<br>C4,PSMD2,PTPN3,RAD51B,RBL2,CCL2,A<br>URKA,TAL1,TFDP1,CDC45,CUL1,SSNA1,<br>TNKS,BECN1,GBF1,BTRC,ADAMTS1,VP<br>S4B,MDC1,ESPL1,KNTC1,PARP3,TOM1L1<br>,PSME3,CTDSPL,TACC3,NEK6,FGFR1OP,                                                          |                                                                                                                                                                                                                                                                                                                   |

|            |      |                                                |    |       |                                                                                                                                                                                                           |
|------------|------|------------------------------------------------|----|-------|-----------------------------------------------------------------------------------------------------------------------------------------------------------------------------------------------------------|
|            |      |                                                |    |       | PLCB1,VPS4A,GPR132,GTSE1,HAUS6,THAP1,RIOK2,CENPJ,PDXP,CTDSP1,CLSPN,DCLRE1B,ATAD5,DBF4B,BRSK1,GADD45GIP1,ZNF830,CHMP4C,CDCA5,LSM11,SIK1,USP17L2                                                            |
| GO:0002699 | GO   | positive regulation of immune effector process | 35 | -9.08 | CD86,CD40,F2RL1,GATA3,HMOX1,IFNG,IL12A,ITGAM,LGALS9,LYN,CD46,MICB,MSH2,MYB,PRKCZ,RAC2,VAMP2,TLR4,TNFRSF4,VAV1,WNT5A,SNX4,RIPK2,DDX21,VAMP3,SOCS5,PUM1,RASGRP1,CD226,DDX58,SASH3,SPHK2,ATAD5,ULBP1,USP17L2 |
| hsa00230   | KEGG | Purine metabolism                              | 30 | -8.67 | ADCY6,ADSS2,ENTPD6,ENTPD5,GMPR,GUCY1A1,HPRT1,IMPDH2,ITPA,NME3,NT5E,PDE2A,PDE3A,PDE6D,POLR2L,PRPS1,PAPSS2,POLR1C,PAICS,POLR3G,PDE10A,NUDT5,ENPP4,PDE7B,RRM2B,POLR1D,POLE4,NTPCR,NT5C3B,ADCY4               |
